## CryoEM of endogenous mammalian V-ATPase interacting with the TLDC protein mEAK-7

Yong Zi Tan<sup>1,^,&</sup>, Yazan M. Abbas<sup>1</sup>, Jing Ze Wu<sup>2,3</sup>, Di Wu<sup>4,5</sup>, Geoffrey G. Hesketh<sup>6</sup>, Stephanie A. Bueler<sup>1</sup>, Anne-Claude Gingras<sup>6,7</sup>, Carol V. Robinson<sup>4,5</sup>, Sergio Grinstein<sup>2,3</sup>, John L. Rubinstein<sup>1,3,8,\*</sup>

<sup>1</sup>Molecular Medicine Program, The Hospital for Sick Children Research Institute, Toronto, ON M5G 0A4, Canada.

<sup>2</sup>Program in Cell Biology, The Hospital for Sick Children, Toronto, ON M5G 0A4, Canada.

<sup>3</sup>Department of Biochemistry, University of Toronto, Toronto, ON M5S 1A8, Canada.

<sup>4</sup>Physical and Theoretical Chemistry Laboratory, University of Oxford, Oxford, OX1 3QZ, UK.

<sup>5</sup>Kavli Institute for Nanoscience Discovery, University of Oxford, Oxford, OX1 3QU, UK.

<sup>6</sup>Lunenfeld-Tanenbaum Research Institute, Sinai Health System, Toronto, ON M5G 1X5, Canada.

<sup>7</sup>Department of Molecular Genetics, University of Toronto, Toronto, ON M5S 1A8, Canada.

<sup>8</sup>Department of Medical Biophysics, University of Toronto, Toronto, ON M5G 1L7, Canada.

<sup>^</sup>Current address: Department of Biological Sciences, National University of Singapore, 16 Science Drive 4, Singapore 117558, Singapore.

<sup>&</sup>Current address: Disease Intervention Technology Laboratory, Immunos, Agency for Science, Technology and Research (A\*STAR), 8A Biomedical Grove, Singapore 138648, Singapore.

<sup>\*</sup> Correspondence to: [john.rubinstein@utoronto.ca](mailto:john.rubinstein@utoronto.ca)

### Abstract

V-ATPases are rotary proton pumps that serve as signaling hubs with numerous proposed binding partners in cells. We used cryoEM combined with exhaustive focused classification to detect endogenous proteins that associate with V-ATPase from porcine kidney. A super-stoichiometric copy of subunit C was found in ~3% of complexes, while an additional ~1.6% of complexes bound mEAK-7, a protein with proposed roles in dauer formation in nematodes and mTOR signaling in mammals. High-resolution cryoEM of porcine kidney V-ATPase with recombinant mEAK-7 shows that mEAK-7's TLDC domain interacts with V-ATPase's stator while its C-terminal  $\alpha$  helix binds V-ATPase's rotor. This crosslink would be expected to inhibit rotary catalysis. However, unlike inhibition of yeast V-ATPase by the TLDC protein Oxr1p, exogenous mEAK-7 does not inhibit V-ATPase and mEAK-7 overexpression in cells does not alter lysosomal or phagosomal pH. Instead, cryoEM suggests that interaction of mEAK-7 with V-ATPase is disrupted by ATP-induced rotation of the rotor. Comparison of Oxr1p and mEAK-7 binding explains this difference. Together, these results show that differences in V-ATPase binding by TLDC domain-containing proteins can lead to effects ranging from strong inhibition to formation of labile interactions that are sensitive to the enzyme's activity.

## Introduction

Vacuolar-type adenosine triphosphatases (V-ATPases) are large, membrane-embedded protein complexes that function as proton pumps in eukaryotic cells. V-ATPase activity is essential for acidification of numerous intracellular compartments including endosomes, lysosomes, and secretory vesicles (Forgac, 2007). In some specialized cells V-ATPases pump protons from the cytoplasm to the extracellular environment, enabling activities ranging from acidification of the distal renal tubule lumen by kidney intercalated cells to dissolution of bone minerals by osteoclasts (Eaton et al., 2020). The enzyme consists of a soluble catalytic  $V_1$  region that hydrolyzes ATP and a membrane-embedded  $V_0$  region responsible for proton pumping. ATP hydrolysis in the  $A_3B_3$  subcomplex of the  $V_1$  region induces rotation of the rotor subcomplex, which contains subunits D, F, d, and a ring of membrane-embedded c subunits (Vasanthakumar and Rubinstein, 2020). In the mammalian  $V_0$  region, the c-ring is comprised of nine c subunits and a single c" subunit, with subunits ATP6AP1/Ac45 and ATP6AP2/PRR trapped inside the ring (Abbas et al., 2020). Rotation of the c-ring against subunit a drives proton translocation through the membrane. Three peripheral stalks, each consisting of heterodimers of subunits E and G, hold subunit a, along with subunits e and f (known as RNaseK in mammals) (Abbas et al., 2020), stationary relative to the rotor. Proton pumping by V-ATPase is regulated by the reversible dissociation of the  $V_1$  and  $V_0$  regions (Kane, 1995; Sumner et al., 1995), with subunit H inhibiting ATP hydrolysis in the detached  $V_1$  region (Parra et al., 2000) and subunit C separating from  $V_1$  following dissociation (Tabke et al., 2014).

V-ATPases interact with other proteins in the cell (Lee et al., 1999; Lu et al., 2001). In particular, V-ATPases are increasingly recognized as having important roles in signaling pathways such as Wnt (Cruciat et al., 2010), mTOR (Zoncu et al., 2011), and Notch (Vaccari et al., 2010; Yan et al., 2009), with each pathway involving different proteins interacting with the enzyme. Further, analysis of V-ATPase from kidney tissue identified ARHGEF7, DMXL1, EZR, NCOA7, OXR1, RPS6KA3, SNX27, and nine subunits of the CCT complex as V-ATPase associated proteins (Merkulova et al., 2015). Two of these proteins, NCOA7 and OXR1, contain TLDC domains (Tre2/Bub2/Cdc16 lysin motif domain catalytic), which has been proposed as a V-ATPase interacting module (Eaton et al., 2021). These proteins are believed to protect against oxidative stress through an unknown mechanism (Finelli et al., 2016). The numerous roles and interactions involving V-ATPases suggest that in cells the enzyme may be found in complex with many different binding partners.

To identify low abundance complexes between mammalian V-ATPase and its binding partners, we first determined the subunit composition and structure of V-ATPase prepared from porcine kidney. We then subjected images of this complex to an exhaustive 3D classification strategy designed to detect low-population structures. This procedure revealed a small population of V-ATPase complexes with super-stoichiometric occupancy of the C subunit, and a second small population of complexes with an additional density bound to the catalytic  $A_3B_3$  subcomplex and one of the peripheral stalks. We tentatively identified this protein as the TLDC domain containing protein mEAK-7 using mass spectrometry and subsequently confirmed the interaction by determining a high-resolution structure of V-ATPase with recombinant mEAK-7 bound. mEAK-7 has been proposed to activate the mechanistic target of rapamycin (mTOR) pathway but was not previously suggested to interact with V-ATPase (Mendonça et al., 2020; Nguyen et al., 2019, 2018). The structure shows that the TLDC domain and a C-terminal domain are critical for V-

ATPase interaction. The mEAK-7 C-terminal domain is unique among TLDC-containing proteins and forms an  $\alpha$  helix that binds to the central rotor of the V-ATPase, thereby crosslinking the stator and rotor parts of the enzyme. This crosslink would be expected to block rotation and ATP hydrolysis by the enzyme. Intriguingly, and in sharp contrast with the yeast TLDC protein Oxr1p (Khan et al., 2021), mEAK-7 binding does not inhibit activity both *in vitro* and in cells, with ATP hydrolysis partially disrupting the interaction. This behavior suggests that mEAK-7 interaction with V-ATPase is sensitive to the activity of the enzyme, which may relate to mEAK-7's previously proposed roles in cellular signaling. Together, these results suggest a surprising diversity in the consequences and biological roles of TLDC domain protein interactions with V-ATPases.

## Results and Discussion

### *Overall structure of the porcine kidney V-ATPase*

In order to identify low-abundance complexes between V-ATPases and the proteins that bind to it in cells, we isolated intact V-ATPase from porcine kidney using a fragment of the bacterial effector protein SidK (Abbas et al., 2020) (Fig. 1A). Extracting the enzyme from membranes with the detergent glyco-diosgenin (GDN) retained subunit H in the complex, similar to extraction with other mild detergents (L. Wang et al., 2020; R. Wang et al., 2020). Multiple V-ATPase subunits have isoforms encoded by different genes that are expressed in a tissue-dependent manner and targeted to different intracellular compartments (Toei et al., 2010). Mass spectrometry identified the isoform composition of the porcine kidney V-ATPase preparation as subunits A, B1, C, D, E1, F, G1 and H in the  $V_1$  region, and subunits a1, c, c'', d1, e2, RNaseK, ATP6AP1/Ac45, and ATP6AP2/PRR in the  $V_0$  region (Fig. 1A, Fig. S1, Supplementary Data 1 and Supplementary Data 2). Notably, these subunit isoforms correspond to the ubiquitous lysosomal V-ATPase subunits and, other than subunit B1, do not include the kidney-specific isoforms C2, G3, a4, or d2 (Toei et al., 2010). While initially surprising, this finding is consistent with the kidney-specific isoforms being expressed primarily in  $\alpha$ -intercalated cells, which comprise <4% of kidney cells (Park et al., 2018). Despite the presence of bound SidK, which inhibits V-ATPase by ~30% (Maxson et al., 2021; Zhao et al., 2017), the specific ATPase activity of the preparation was  $2.9 \pm 0.72$   $\mu\text{mol ATP}/\text{min}/\text{mg}$  ( $\pm$  s.d., n=6 independent assays from two separate enzyme preparations). The preparation is also highly coupled, showing 91% inhibition by bafilomycin.

CryoEM of the preparation, combined with 3D classification during image analysis, led to three structures of the complex in each of its three main rotational states (Zhao et al., 2015) at nominal resolutions of 3.7 to 4.1 Å (Fig. 1B, *left*, Fig. S2 and S3, Table S1). Focused refinement of these maps resolved the  $V_1$  regions at 3.6 to 4.0 Å resolution and the  $V_0$  regions at 3.7 to 5.8 Å resolution (Fig. S2 and S3). Combined with the identities of subunit isoforms from mass spectrometry, the cryoEM maps allowed for construction of atomic models of the porcine kidney V-ATPase in the different rotational states (Fig. 1B, *right*, and 1C, Fig. S4). These atomic models were complete except for residues 8 to 82 of subunit G1 in peripheral stalk 1 and residues 10 to 115 of subunit E1 in peripheral stalk 2, which were modelled as poly-alanine, and residues 667 to 713 of subunit a1, which could not be modelled. Overall, the models of the porcine kidney V-ATPase closely resembles previous mammalian V-ATPase structures (Abbas et al., 2020; L. Wang et al., 2020; R. Wang et al., 2020).

### ***Some kidney V-ATPase complexes have an additional C subunit or mEAK-7 bound***

In order to search for endogenous sub-stoichiometric binding partners of V-ATPase, signal corresponding to the known parts of the complex was estimated from the atomic models and subtracted from images (Bai et al., 2015). 3D classification without refinement of particle orientation (Scheres et al., 2007) was then performed within masks adjacent to the complex that were designed to contain any density that is not part of the V-ATPase (Fig. S5). To facilitate this analysis, a dataset comprising 737,357 particle images, including protein with a variety of nucleotide analogues, was subjected to the procedure. 3D classification revealed two small populations of complexes, each with a different additional density bound to the V-ATPase (Fig. 1C). The first population comprised ~3% of the dataset and is found in all three of the main rotational states of the enzyme, with 1.2% in State 1, 1.2% in State 2, and 0.6% in State 3. The additional density bridges peripheral stalks 1 and 3 of the V<sub>1</sub> region of the enzyme, which are usually not connected (Fig. 1A and C, *middle column*). This density appears to correspond to an additional copy of subunit C (Fig. 1D), which typically bridges peripheral stalks 2 and 3 (Fig. 1B and D). The observation of a population of V-ATPase complexes with two copies of subunit C explains previous native mass spectrometry of rat brain V-ATPase that indicated the existence of complexes with two C subunits (Abbas et al., 2020). The significance of this variant of the structure is not clear, but it may correspond to V-ATPase complexes that misassemble due to the dynamic nature of the association of the V<sub>1</sub> and V<sub>O</sub> regions.

The second additional density is found in ~1.6% of particle images and only appeared with the complex in rotational State 2 (Fig. 1C, *right column*). This density abuts subunit B, subunit A, and peripheral stalk 3. The shape of the density does not correspond to any of the known subunits of V-ATPase. It is not clear if the fraction of particle images with this additional density represents the true fraction of V-ATPase complexes in cells with this protein bound, or if the interaction is more common but is disrupted during purification of V-ATPase. The list of proteins identified by mass spectrometry of the preparation (Supplementary Data 1) was inspected to identify candidate proteins that could explain the density. After excluding V-ATPase subunits, the most abundant ~50 kDa proteins based on iBAQ scores (intensity Based Absolute Quantification) were the  $\alpha$  and  $\beta$  subunits of mitochondrial ATP synthase followed by mEAK-7. Structures are known for both subunit  $\alpha$  and  $\beta$  from ATP synthase (Abrahams et al., 1994) and they do not fit the unexplained density, excluding them as the bound protein in the low-resolution cryoEM map. In contrast, a homology model of mEAK-7 could be fit in the density with a clear agreement between  $\alpha$  helices in the model and map density (Fig. 1E), suggesting that this extra density could be due to mEAK-7.

### ***mEAK-7 interacts with catalytic subunits and a peripheral stalk from V-ATPase***

mEAK-7 is the mammalian homologue of *Caenorhabditis elegans* EAK-7 (enhancer-of-akt-1-7), which regulates dauer formation in nematodes (Alam et al., 2010; Lee et al., 2001; Lin et al., 2001). Mutations in *C. elegans* EAK-7 promote diapause and longevity (Alam et al., 2010). In mammals, mEAK-7 has been proposed to activate an alternative mTOR pathway, thereby regulating S6K2 activation and 4E-BP1 repression (Nguyen et al., 2018). To test the hypothesis that the additional density seen in Figure 1E is indeed mEAK-7, DNA sequence encoding the protein was cloned into a vector with an N-terminal 6×His tag, expressed heterologously in *Escherichia coli*, and purified to homogeneity. Purified mEAK-7 was mixed with porcine V-

ATPase at ~20× molar excess and cryoEM specimens were prepared and subjected to structure determination. Particle images were again sorted into classes corresponding to the three main rotational states of the enzyme. The map of rotational State 2 showed V-ATPase with mEAK-7 bound (Fig. 2A, *left*, Fig. S6A and B, Table S2 and S3). The resolution of the map allowed for construction of an atomic model of the complex (Fig. 2A, *right*, and Fig. 2B). This atomic model of mEAK-7 could be overlaid with the map from the endogenous complex with high fidelity (Fig. S6C), confirming the identity of the additional endogenous binding protein shown in Figure 1E as mEAK-7. mEAK-7 contains an N-terminal myristoylated motif (Fig. 2C, *red arrow*), followed by a region resembling an EF-hand domain (Fig. 2C, *cyan*), a TLDC domain (Fig. 2C, *yellow, green, and orange*), and a C-terminal  $\alpha$  helix that is separated from the rest of the protein by an extended linker region (Fig. 2C, *red*) (Finelli and Oliver, 2017). The N terminus of mEAK-7 is poorly resolved in the map, suggesting that it is disordered in the detergent-solubilized protein.

mEAK-7 binding to V-ATPase is mediated through conserved regions in its TLDC domain and C-terminal  $\alpha$  helix (Fig. 2D). The C-terminal  $\alpha$  helix binds subunit D from the central rotor of V-ATPase (Fig. 2E, *left*) as well as a B1 subunit (Fig. 2E, *right*), facilitated mainly by hydrophobic interactions. This  $\alpha$  helix is formed from sequence in the protein that was previously proposed to bind mTOR (Nguyen et al., 2018). The structure shows that this sequence is held against the D subunit away from the cytoplasm and could not interact with mTOR, at least when mEAK-7 is bound to V-ATPase. Binding of mEAK-7 to rotational State 2 causes numerous subtle conformational changes throughout the complex (Fig. S6D). The structure of the TLDC domain resembles previously-determined TLDC domain structures (Fig. S6E).

The TLDC domain binds V-ATPase through interactions with subunits E1, A, and B1 (Fig. 2F). Binding involving subunit E1 occurs through apparent stacking interactions between Tyr341 from mEAK-7 and Glu29 from subunit E1, electrostatic interaction between Lys384 from mEAK-7 and Asn39 from subunit E1, and hydrophobic interactions between Tyr367 from mEAK-7 and Ile40 from subunit E1 (Fig. 2F, *left*). Binding involving subunit A occurs through apparent ionic interactions between Thr354 and Gln317 from mEAK-7 with backbone atoms from residues Arg553 and Thr557 from A subunit, respectively, and hydrophobic interactions between Pro316 from mEAK-7 and Ala559 from subunit A (Fig. 2F, *middle*). Residues Gly276 and His277 from the TLDC domain of mEAK-7 interact with backbone atoms from Phe481 and Pro482 of subunit B1 (Fig. 2F, *right*). Together the TLDC domain and C-terminal  $\alpha$  helix form a pincer-like grip around B1 (Fig. 2A).

The domain homologous to an EF-hand motif in mEAK-7 consists of seven  $\alpha$  helices (Fig. 2C and Fig. S7A). EF-hand motifs can bind or release other proteins in response to calcium binding (Burgoyne and Haynes, 2012). However, inspection of the sequence of the apparent EF-hand motif in mEAK-7 shows that it is missing key conserved acidic residues needed for calcium binding (Fig. S7B) and is poorly conserved compared to rest of mEAK-7 (Fig. 2D). Further, titration of mEAK-7 with calcium did not notably change its circular dichroism spectrum (Fig. S7C) and cryoEM in the presence of calcium or the calcium chelators EDTA and EGTA did not change the structure of the mEAK6:V-ATPase complex (Fig. S7D). Consequently, the apparent EF-hand-like motif in mEAK-7 appears to be structural rather than calcium sensing.

### ***mEAK-7 interaction with V-ATPase does not affect enzyme activity***

mEAK-7 crosslinks the rotor and stator parts of V-ATPase, with its C-terminal  $\alpha$  helix interacting with subunit D from the rotor and the TLDC domain interacting with peripheral stalk 3 and an AB pair (Fig. 2A). This interaction would be expected to inhibit ATP hydrolysis and proton pumping by V-ATPase, similar to chemical crosslinks between the rotor and stator in other rotary ATPases (Srivastava et al., 2018). To assess how mEAK-7 affects V-ATPase activity, we performed ATPase assays with V-ATPase in the presence of recombinant mEAK-7 (Fig. 3A). To our surprise, a 100 $\times$  molar excess of mEAK-7 did not detectably inhibit ATPase activity. The excess of mEAK-7 also did not affect bafilomycin sensitivity of the preparation, showing that the  $V_1$  and  $V_0$  regions of the enzyme remained coupled in the presence of mEAK-7. This coupling shows that mEAK-7 does not cause dissociation of  $V_1$  and  $V_0$  with purified V-ATPase.

Perturbation of V-ATPase activity in cells would also be expected to affect the pH of lysosomes and phagosomes, which rely on V-ATPase for acidification. It is possible that mEAK-7 expression in cells modulates V-ATPase activity by influencing the assembly status of the  $V_1$  region with the  $V_0$  region (Kane, 1995; Sumner et al., 1995), which could affect the steady state pH of lysosomes and phagosomes. This hypothesis would be in line with the recent finding that yeast Oxr1p promotes dissociation of yeast V-ATPase (Khan et al., 2021). To detect mEAK-7-induced changes in V-ATPase activity in cells, we cloned mEAK-7 into a vector for overexpression in mammalian cells. Ectopic expression of mEAK-7 with a C-terminal mCherry tag in HEK293T cells with lysosomes labelled with FITC-dextran (Canton and Grinstein, 2015) confirmed the lysosomal localization of the protein, as shown previously (Nguyen et al., 2018) (Fig. 3B). As the C-terminal mCherry tag could interfere with binding of mEAK-7's C-terminal  $\alpha$  helix to V-ATPase subunit D, subsequent experiments were performed with untagged mEAK-7 co-transfected with PLC $\delta$ -PH-RFP, a PtdIns(4,5) $P_2$  biosensor that associated with the inner leaflet of the plasma membrane (Botelho et al., 2000; Lemmon et al., 1995) but not with lysosomes, to confirm successful transfection. Consistent with the *in vitro* ATPase assays, expression of this construct in HEK293T cells (Fig. 3C) and macrophage-like RAW 264.7 cells (Fig. 3D) did not lead to changes in the steady state lysosomal pH or phagosomal pH, respectively (Canton and Grinstein, 2015). Together, these experiments indicate that mEAK-7 expression neither inhibits nor activates V-ATPase *in vitro* or in cells.

### ***V-ATPase binding by mEAK depends on its C-terminal $\alpha$ helix and is ATP-sensitive***

To understand the relative importance of mEAK-7's TLDC domain and C-terminal  $\alpha$  helix for V-ATPase binding, we prepared a construct of mEAK-7 with the C-terminal  $\alpha$  helix removed by truncation at residue Ser415. This construct was expressed heterologously in *E. coli*, purified to homogeneity, and mixed with V-ATPase at  $\sim 20\times$  molar excess for structure determination by cryoEM. As described above, intact mEAK-7 binds V-ATPase in rotational State 2 and is seen in all 3D classes corresponding to this state (Fig. 4A, *left*). While 3D classification identified a population comprising  $\sim 25\%$  of particle images where the density for mEAK-7's N-terminal domain and TLDC domain are weak and poorly resolved, suggesting that they are loosely attached via the TLDC domain, density for mEAK-7's C-terminal  $\alpha$  helix remains strong and well resolved even in this 3D class (Fig. 4A, *upper left, circled in orange*). In contrast, when the C-terminal  $\alpha$  helix is truncated most V-ATPase complexes in rotational State 2 do not bind mEAK-7 (Fig. 4A, *upper middle*). Only  $\sim 22\%$  of particle images showed any density for the N-

terminal domain and TLDC domain of mEAK-7 when the C-terminal  $\alpha$  helix was truncated, and even this density was weak and poorly resolved (Fig. 4A, *lower middle*). These experiments indicate that mEAK-7's C-terminal  $\alpha$  helix is important for the tight binding of V-ATPase by mEAK-7.

The observation that mEAK-7, which crosslinks the rotor and stator of V-ATPase in the structure, does not affect the enzyme's activity *in vitro* or in cells suggests that the crosslink is broken during rotary catalysis. To determine the effect of ATP hydrolysis on mEAK-7 crosslinking of the rotor and the stator, V-ATPase was mixed with a  $\sim 20\times$  molar excess of mEAK-7, ATP was added to 10 mM and mixed, and cryoEM grids were frozen within 5 s. Given the concentration of V-ATPase (20 mg/mL) and the enzyme's specific ATPase activity ( $2.9 \pm 0.72 \mu\text{mol ATP}/\text{min}/\text{mg}$ ), these conditions ensure that the grids were frozen before the supply of ATP was consumed. With ATP added, a population of particles appeared with mEAK-7 entirely absent in rotational State 2 (Fig. 4A, *upper right*). In this state, even density for the C-terminal  $\alpha$  helix is missing (Fig. 4A, *upper right, circled in orange*), which does not occur with intact mEAK-7 without ATP. Thus, it appears that rotation of the rotor, driven by ATP hydrolysis, can result in the displacement of mEAK-7 from V-ATPase and disruption of the cross-link between the enzyme's rotor and stator. Despite several biochemical experiments, we were unable to demonstrate that mEAK-7 can be fully dissociated from V-ATPase by the addition of ATP to the complex, suggesting that it can remain associated to V-ATPase, either by its TLDC domain or its C-terminal  $\alpha$  helix, during ATP hydrolysis.

It was previously shown that V-ATPase activity, but not V-ATPase mediated acidification of lysosomes, is necessary for mTOR signaling (Zoncu et al., 2011). Further, the C-terminal  $\alpha$  helix of mEAK-7 was previously proposed to interact directly with mTOR (Nguyen et al., 2018), which could not occur when mEAK-7 is attached to V-ATPase. The observed ATP-sensitive interaction of mEAK-7 with V-ATPase could relate to its proposed roles: partial displacement of mEAK-7 from V-ATPase during ATP hydrolysis by V-ATPase would allow one of the domains from mEAK-7 to bind other proteins (Fig. 4B, Video 1). To detect mEAK-7 interactions that could occur when the protein is fully or partially separated from V-ATPase, we prepared a construct with N-terminally 3 $\times$ FLAG tagged mEAK-7 and incubated it with both porcine kidney and brain lysate in the presence of 1% CHAPS. We then purified the mEAK-7 by affinity chromatography and identified enriched proteins by mass spectrometry (Fig. S8). As a control experiment, proteins from an identical purification in the absence of 3 $\times$ FLAG-tagged mEAK-7 were also identified. This experiment showed specific enrichment of numerous V-ATPase subunits, but no additional interacting proteins could be detected with confidence. It is possible that interaction of the C-terminal  $\alpha$  helix from mEAK-7 with other proteins relies on post-translational modifications, as this region of the protein was found to be phosphorylated at Ser440, 444 and 446 in multiple cellular contexts (Wilhelm et al., 2014). Phosphorylation of these residues would likely prevent the C-terminal domain from binding V-ATPase and could also serve as a mechanism for regulating mEAK-7 binding to V-ATPase and other proteins. Alternatively, separation of mEAK-7 from V-ATPase could expose new binding sites on V-ATPase for other interacting protein. Finally, it is possible that protein interactions with mEAK-7 were missed due to their occurring at sub-stoichiometric levels, with low affinity, or in different cellular contexts.

### ***TLDC proteins exhibit divergent interactions with V-ATPase***

TLDC domain-containing proteins are widespread in biology (Fig. 5A) (Finelli and Oliver, 2017). OXR1 (Merkulova et al., 2015) and NCOA7 (Castroflorio et al., 2021) are known to interact with V-ATPase, with mutation of the latter causing neurological effects. The short TLDC-containing NCOA7-B isoform is induced by interferons and also interacts with V-ATPase, inhibiting endosome-mediated viral entry into cells and apparently increasing vesicle acidification (Doyle et al., 2018).

Following release of a preprint for the present study (Tan et al., 2021) a manuscript was published showing that the yeast TLDC protein Oxr1p binds to the yeast  $V_1$  complex, releasing subunit H and promoting dissociation of  $V_1$  from  $V_O$  (Khan et al., 2021). Subunit H normally inhibits ATP hydrolysis in the  $V_1$  complex (Parra et al., 2000), but  $V_1$ :Oxr1p is inhibited even though subunit H is absent (Khan et al., 2021). Comparison of the binding mode of Oxr1p (Fig. 5B, *left*) and mEAK-7 (Fig. 5B, *middle*) shows notable differences in their interactions with V-ATPase: Oxr1p binds the enzyme in rotational State 1, while mEAK-7 binds it in rotational State 2. Further, Oxr1p attaches to peripheral stalk 2 while mEAK-7 attaches to peripheral stalk 3. Most notably, Oxr1p binding forces the peripheral stalk 2 into a highly strained conformation (Fig. 5B, *left*) that is not seen in any of the peripheral stalks in V-ATPase with mEAK-7 (Fig. 5C, *center*). This strained peripheral stalk explains why Oxr1p binding promotes dissociation of  $V_1$  from  $V_O$  while mEAK-7 binding does not. Recent structures of yeast  $V_1$  and  $V_1\Delta C$  complexes show a sharp bending of peripheral stalk 2 induced by interaction with subunit H (Vasanthakumar et al., 2021), which is similar to the bending seen with Oxr1p (Fig. 5C, *right*). The interaction of subunit H with peripheral stalk 2 and the resulting bending of the peripheral stalk was proposed to be responsible for inhibiting ATP hydrolysis of  $V_1$ , as disruption of the interaction prevents subunit H from inhibiting ATP hydrolysis (Vasanthakumar et al., 2021). Thus, the different location for mEAK-7 binding compared to Oxr1p and its minor influence on the structure of the V-ATPase explain why Oxr1p inhibits ATP hydrolysis but mEAK-7 does not.

How the labile binding of mEAK-7 and inhibitory binding of Oxr1p relate to the *in vivo* activities of the proteins remains unclear and warrants further study. While Oxr1p appears to have evolved to disrupt V-ATPase and block its activity, mEAK-7 could function as a sensor of V-ATPase activity. This variability between the binding mode and effect of TLDC proteins points to interesting differences throughout the TLDC protein family, which have been linked to numerous different processes (Castroflorio et al., 2021; Finelli et al., 2019; Svistunova et al., 2019). While it has become clear that TLDC domains are V-ATPase interaction modules (Eaton et al., 2021) the differences between the proteins suggests a fascinating diversity of biological roles that remains to be uncovered.

### **Author contributions:**

Y.Z.T. co-developed the protein purification strategy, purified protein, performed biochemical assays, and performed cryo-EM and image analysis, built atomic models. Y.M.A. co-developed the initial purification strategy. S.A.B. co-developed the initial V-ATPase purification strategy. D.W. identified subunit isoforms for V-ATPase in preparation with supervision from C.V.R. G.G.H. identified proteins that bound to recombinant mEAK-7 with supervision from A.-C.G. J.W. measured the effect of mEAK-7 overexpression on lysosome and phagosome pH with



supervision from S.G. J.L.R. conceived the project, and supervised and coordinated experiments. Y.Z.T. and J.L.R. wrote the manuscript and prepared the figures with input from the other authors.

### **Acknowledgements**

We thank S. Benlekbir for assistance with cryo-EM data collection, Z.-Y. Lin for assistance with mass spectrometry sample preparation and analysis, G. Wasney and S. Popa assistance with circular dichroism, A. Kotecha and F.J.A. Koh for data collection for the V-ATPase sample with mEAK-7 and calcium using the Glacios microscope with Falcon4 Selectris X, B. McDougall for providing porcine tissue, and members of the Rubinstein laboratory for discussions. This work was supported by the Canadian Institutes of Health Research (CIHR) Project Grant PJT166152 (J.L.R.), CIHR Foundation grants FDN-143202 (S.G.) and FDN-143301 (A.-C.G). The Canada Research Chairs program (J.L.R. and A.-C.G), Canadian Cancer Society Research Institute i2I grant 705938 (A.-C.G.), Wellcome Trust, grant 221795/Z/20/Z (C.V.R.), Canadian Institutes of Health Research Postdoctoral fellowship (Y.Z.T., Y.M.A.), Agency for Science, Technology and Research Singapore (Y.Z.T.), National University of Singapore (NUS) Presidential Young Professorship R-154-000-C62-133 (Y.Z.T.), Ministry of Education Singapore (Y.Z.T.). Cryo-EM data was collected at the Toronto High-Resolution High-Throughput cryo-EM facility and enzyme assays performed using infrastructure from the Hospital for Sick Children's Structural & Biophysical Core Facility, both of which are supported by the Canada Foundation for Innovation and Ontario Research Fund. Some of the proteomics experiments were performed at the Network Biology Collaborative Centre at the Lunenfeld-Tanenbaum Research Institute, a facility supported by Canada Foundation for Innovation funding, by the Government of Ontario, and by Genome Canada and Ontario Genomics (OGI-139).

### **Conflict of Interests**

The authors declare that they have no conflict of interest.

### **Data and materials availability**

CryoEM maps have been deposited into the EMDB as EMD- XXXX. Models have been deposited into the PDB as XXXX.

## Methods

### *Protein purification*

Porcine kidneys were chilled to 4 °C in 1L of homogenization buffer (4 mM HEPES pH 7.4, 320 mM sucrose, 0.2 mM PMSF). All subsequent steps were performed at 4 °C. Each kidney was dissected to separate the softer cortex and medulla tissue from the more rigid pelvis tissue. The cortex and medulla tissue were blended with homogenization buffer for 1 min in a total volume of ~500 mL for four kidneys at high speed followed by a 10 s pause and an additional 1 min of blending. Cell debris was removed by centrifugation at 800 ×g for 20 min. The membrane fraction from cells was then collected by centrifugation at 25,000 ×g for 20 min and flash frozen and stored at -80 °C. To solubilize the V-ATPase, solubilization buffer (50 mM HEPES pH 7, 320 mM sucrose, 300 mM NaCl, 10% [v/v] glycerol, 5 mM EDTA, 5 mM aminocaproic acid, 5 mM para aminobenzamidine, 0.2 mM PMSF) was added to the membrane fraction at 8 mL/g and resuspended with a Dounce homogenizer. Approximately 6 g of membranes were used for each preparation. The detergent glycol diosgenin (GDN) was added to 1% (w/v) and incubated with gentle mixing overnight. Following solubilization, V-ATPase purification and assay was performed with no added lipids at 37°C as described previously (Abbas et al., 2020), except with 0.025% (w/v) GDN as the detergent and gel filtration with a Superose 6 Increase 10/300 column (GE Healthcare) following affinity purification.

Recombinant mEAK-7 from *Sus scrofa* (uniprot ID: A0A4X1T484) was synthesized in a pET28 vector with N-terminal 6×His tag (GenScript). ArcticExpress competent cells (Agilent) were transformed with the plasmid and plated onto Luria broth (LB) agar supplemented with 50 µg mL<sup>-1</sup> kanamycin (Sigma) and grown overnight at 37 °C. A transformed colony was used to inoculate a starter culture containing 10 mL of 2xYT medium supplemented with 50 µg mL<sup>-1</sup> kanamycin. The starter culture was grown overnight at 37 °C with shaking at 240 rpm, and 10 mL of this culture was used to inoculate 1 L of 2xTY medium supplemented with 50 µg mL<sup>-1</sup> kanamycin. The culture was grown at 37 °C with shaking at 240 rpm to an OD of ~0.8, with the temperature then reduced to 7 °C and protein expression was induced overnight by addition of 1 mM isopropyl β-D-1-thiogalactopyranoside (IPTG) (Fisher). All further steps were performed at 4 °C. Cells were harvested by centrifugation at 4000 ×g for 15 min and the cell pellet was resuspended in phosphate buffered saline (PBS) and centrifuged again at 4000 ×g for 30 min. The cell pellet was then resuspended in lysis buffer (50 mM Tris-HCl pH 7.4, 300 mM NaCl, 0.2 mM PMSF) at ~8 mL/g of wet cell pellet. The resuspended cells were lysed by sonication (Q Sonica Q500) with 2 s on, 2 s off at 30 % amplitude for 10 min and cell debris was removed by centrifugation at 130,000 ×g for 45 min with a Type 70 Ti Rotor (Beckman Coulter). The supernatant was filtered through a 0.22 µm filter (Sigma) and loaded onto a HisTrap HP 5 mL column previously equilibrated with HisTrap buffer (50 mM Tris-HCl pH 7.4, 300 mM NaCl, 20 mM imidazole). The column was washed with 10 column volumes (CV) of HisTrap buffer followed by elution with 5 CV of HisTrap buffer with imidazole added to 300 mM. Eluted protein was concentrated with a 10 kDa MWCO concentrator (Amicon) to ~500 µL before two rounds of gel filtration, first with a Superose 6 Increase 10/300 column and then a Superdex 75 10/300 column. The purified protein was pooled, flash frozen, and stored at -80 °C for subsequent use.

### *Cryo-EM sample preparation, data collection, and image analysis*

Purified V-ATPase was concentrated to ~20 mg/mL and 1.2  $\mu$ L was applied onto the copper side of nanofabricated gold grids (Marr et al., 2014) in the environmental chamber of a Leica EM GP2 grid freezing device (>80% RH, 277 K). Grids were blotted on the copper side for 1 s before plunge freezing in liquid ethane. To freeze grids with V-ATPase and mEAK-7, V-ATPase at 20 mg/mL was mixed with a ~20 $\times$  molar excess of mEAK-7 (~1 mg/mL) and incubated for 30 minutes on ice. For grids with V-ATPase, mEAK-7, and ATP, V-ATPase was first incubated with mEAK-7 on ice. ATP with MgCl<sub>2</sub> at 50 mM (0.4  $\mu$ L) was applied on the grid, and immediately before plunge freezing, 1.6  $\mu$ L of V-ATPase:mEAK-7 mixture was added and mixed by pipetting for 2 s. This procedure results in a final concentration of 10 mM ATP and requires a total of 5 s from mixing to plunge freezing.

For the V-ATPase alone, cryoEM data was acquired at 300 kV with a Thermo Fisher Scientific Titan Krios G3 electron microscope and prototype Falcon 4 camera operating in electron counting mode. The calibrated pixel size was 1.02  $\text{\AA}$ /pixel and 5,455 movies, consisting of 29 exposure fractions each with a total exposure of 40  $e^-/\text{\AA}^2$ , were collected. For V-ATPase with recombinant mEAK-7, mEAK-7 $\Delta$ Cterm, mEAK-7 plus ATP, and mEAK-7 plus EDTA with EGTA, cryoEM data was acquired with the same electron microscope. However, for these datasets a lower magnification was used with a calibrated pixel size of 1.3225  $\text{\AA}$ /pixel, and 5,142, 2,013, 5,498, and 2,468 movies consisting of 29 exposure fractions each with total exposures of 36, 37, 44, and 41  $e^-/\text{\AA}^2$ , respectively, were collected. For the V-ATPase with mEAK-7 and calcium, a Thermo Fisher Scientific Glacios electron microscope and Falcon 4 camera with Selectris X energy filter was used. The slit width was 10 eV, and aberration-free image shift (AFIS) was used during data collection. The calibrated pixel size was 0.895  $\text{\AA}$ /pixel and 3,209 movies with 1288 frames in EER mode (Guo et al., 2020) with a total exposure of 40  $e^-/\text{\AA}^2$  were collected. All data was collected using the EPU data collection software and, except for the sample with calcium added, monitored using *cryoSPARC* Live (Punjani et al., 2017).

For V-ATPase alone, movies were aligned with UCSF MotionCor2 (Zheng et al., 2017) through *Relion* v3 (Scheres, 2012) and processed using *cryoSPARC* v3. CTF parameters were estimated in patches and template selection of particle images performed using the map of rat brain V-ATPase as the reference (Abbas et al., 2020). 2D classification was then performed to remove undesirable particle images. Multiple rounds of *ab initio* refinement were used to further clean the dataset and a consensus 3D map at 3.9  $\text{\AA}$  resolution from 133,337 particle images was calculated with non-uniform refinement (Punjani et al., 2020). This consensus set of particle images, with their corresponding orientation parameters, were transferred to *Relion* v3 for particle polishing (Zivanov et al., 2019) and transferred back into *cryoSPARC* for heterogenous refinement to separate the three rotational states and for CTF refinement. Non-uniform refinement was then done for each of the three rotational states. For the other datasets, a similar processing strategy was used. For EER data, movies were converted to TIF files containing 46 exposure fractions using *relion\_convert\_to\_tiff*. Transfer of data between *Relion* and *cryoSPARC* was done with *pyem* ([10.5281/zenodo.3576630](https://doi.org/10.5281/zenodo.3576630)).

### *Exhaustive focused classification*

Exhaustive focused classification was done by adapting the *Relion* signal subtraction and focused classification strategy (Bai et al., 2015). The dataset of particle images, including datasets with

additional nucleotide, were classified into the three main rotational states of the enzyme. Next, a model of the enzyme was fitted into the map and used to create a mask for subtracting signal from the core V-ATPase complex from individual particles. A mask that surrounds the V-ATPase complex but extends  $\sim 20$  Å from the surface of complex was then created to search for weakly-bound proteins. This search space was divided into four main regions: the  $V_1$  region, the region above  $V_1$ , the region adjacent to subunit a, and the region surrounding ATP6AP1/Ac45. Focused classification was then performed using each of these four masks. Particle orientation parameters were not refined and a range of T values were tested, as outlined previously (Bai et al., 2015). Fifteen classes were used during classification. If a potential additional density was identified, a new and tighter mask around the region of interest was created to select the signal of interest.

### *Atomic model building*

The atomic models from rat brain V-ATPase (Abbas et al., 2020), the H subunit from human V-ATPase (L. Wang et al., 2020), and an mEAK-7 model predicted by Phyre2 (Kelley et al., 2015) were used to begin model building. Models were built manually in *Coot* (Emsley and Cowtan, 2004) and refined with iterative rounds of adjustment in *Coot*, *Rosetta relax* (Wang et al., 2016), and real space refinement with *Phenix* (Adams et al., 2010; Afonine et al., 2018). This process was continued until statistics calculated with *Molprobit* (Chen et al., 2010) ceased to improve. The final map and model were validated with *cryoSPARC*'s implementation of *bloccres* (Cardone et al., 2013) to assess map local resolution, the *3DFSC* suite (Tan et al., 2017) to calculate directional resolution anisotropy, and the *SCF* program (Baldwin and Lyumkis, 2020) to calculate the sampling compensation factor, which quantifies how preferred particle orientations contribute to attenuation of the Fourier Shell Correlation (FSC). Map-to-model FSCs were calculated by converting the model to a map with the *molmap* function in *Chimera* at the Nyquist resolution. A mask was made from this map with *Relion* (after low-pass filtering to 8 Å, extending by one pixel, and applying a cosine-edge of three pixels), and was applied to the map. Map-to-model FSC was calculated with *proc3d* in *EMAN* (Ludtke et al., 1999).

### *Mass Spectrometry*

Mass spectrometry analysis of the purified V-ATPase and isoform identification was performed as described previously (Abbas et al., 2020). To identify proteins that bind mEAK-7 by mass spectrometry, purified mEAK-7 with 3×FLAG tag was immobilized on M2 affinity gel matrix (2 mL) and washed with ten CVs of buffer (50 mM HEPES pH 7, 300 mM NaCl, 10% [v/v] glycerol) to remove unbound mEAK-7. Membrane fractions (prepared in the same manner for protein purification) were incubated with 1% (w/v) CHAPS for 2 h and passed through the column, followed by ten CVs of wash buffer (300 mM NaCl, 50 mM HEPES pH 7, 10% [v/v] glycerol, 0.3% [w/v] CHAPS), and finally 3 CVs of wash buffer with 150 µg/ml 3×FLAG peptide to elute the mEAK-7. The eluted protein was concentrated and prepared for mass spectrometry using S-Trap Micro spin columns (Protifi) according to manufacturer's instructions. Each sample (5 µL in 5 % formic acid) was loaded at 800 nL/min onto an equilibrated HPLC column and peptides were eluted over a 90 min gradient generated by a Eksigent ekspert™ nanoLC 425 (Eksigent) nano-pump and analysed on a TripleTOF 6600 instrument (SCIEX) operated in data-dependent acquisition (DDA) mode. The DDA method consisted of one 250 ms MS1 TOF survey scan from 400–1800 Da followed by ten 100 ms MS2 candidate ion scans from 100–1800 Da in high sensitivity mode. Only ions with a charge of 2+

to 5+ that exceeded a threshold of 300 cps were selected for MS2, and former precursors were excluded for 7 s after one occurrence. To minimize carryover between each sample, the analytical column was washed for 2 h by running an alternating sawtooth gradient from 35% acetonitrile with 0.1% formic acid to 80% acetonitrile with 0.1% formic acid at a flow rate of 1500 nL/min, holding each gradient concentration for 5 min. Analytical column and instrument performance were verified after each sample by loading 30 fmol bovine serum albumin (BSA) tryptic peptide standard with 60 fmol  $\alpha$ -casein tryptic digest and running a short 30 min gradient. TOF MS mass calibration was performed on BSA reference ions before running the next sample to adjust for mass drift and verify peak intensity.

All raw (WIFF and WIFF.SCAN) files were saved in ProHits (Liu et al., 2016). mzXML files were generated from raw files using the ProteoWizard converter (v3.0.4468) and SCIEX converter (v1.3 beta), implemented within ProHits. The searched databases contained the pig (v88) or rat (v97) complement of the RefSeq protein database (including reversed sequences and common contaminants: 128008 and 134277 total sequences respectively). mzXML files were searched by Mascot (v2.3.02) and Comet (v2016.01 rev. 2) using the following parameters: up to two missed trypsin cleavage sites, methionine oxidation and asparagine/glutamine deamidation as variable modifications. The fragment mass tolerance was 0.15 Da and the mass window for the precursor was  $\pm 40$  ppm with charges of 2+ to 4+ (both monoisotopic mass). Search engine results were analyzed using the Trans-Proteomic Pipeline (TPP v4.6 OCCUPY rev 3) via iProphet. Spectral count data were visualized using ProHits-viz (<https://prohits-viz.org/>) (Knight et al., 2017).

#### *Localization of mEAK-7 and ratiometric determinations of lysosomal and phagosomal pH*

HeLa and HEK293T cells were seeded on 18 mm glass coverslips at a density of  $3 \times 10^5$  cells/mL and were transfected with FuGENE 6 (Promega) transfection reagent 24 h later. RAW264.7 cells were seeded on 18 mm glass coverslips at a density of  $5 \times 10^5$  cells/mL and transfected 24 h later with FuGENE HD. Cells were transfected with 3  $\mu$ L of FuGENE per 1  $\mu$ g of total plasmid. Both cell types were imaged 18 to 24 h post-transfection.

To visualize lysosomal compartments, HeLa cells transiently expressing mEAK-7-mCherry were incubated with 250  $\mu$ g/mL fluorescein isothiocyanate (FITC)-conjugated 10 kDa-dextran at the time of transfection and chased with complete medium 1 h prior to imaging. Coverslips with cells were mounted in a Chamlide magnetic chamber, incubated at 37 °C in HBSS medium, and visualized with a Zeiss Axiovert 200M confocal microscope operated by Volocity v6.3 software. Images were acquired using a 63 $\times$ /1.4 NA oil objective (Zeiss) with an additional 1.5 $\times$  magnifying lens and processed using Volocity v6.3 and Adobe Illustrator.

HEK293T cells transiently transfected with unlabelled mEAK-7 and PLC $\delta$ -PH-RFP (to allow identification of transfected cells) were incubated with 250  $\mu$ g/mL FITC-conjugated 10 kDa-dextran at the time of transfection and chased with complete medium 1 h prior to imaging to visualize lysosomal compartments. RAW264.7 cells co-transfected with unlabelled mEAK-7 and PLC $\delta$ -PH-RFP were incubated with FITC-conjugated zymosan particles, which were taken up into phagosomes, 1 h prior to imaging and were chased with complete medium 30 min prior to imaging to wash away unbound particles. Steady-state lysosomal and phagosomal pH were determined by exciting FITC labelled lysosome/phagosomes at  $481 \pm 15$  nm and  $436 \pm 20$  nm,

respectively, and collecting emitted light at  $520 \pm 35$  nm. The pH-dependent fluorescence intensity of FITC when excited at  $\sim 490$  nm was used as described below to determine the steady-state pH of lysosomes. The much less pH-sensitive fluorescence intensity of FITC when excited at  $\sim 440$  nm was used to control for photobleaching during image acquisition. Multiple fields of cells were imaged for each condition, and the data processed with Volocity v6.3. To convert fluorescence ratios to pH values, cells were sequentially subjected to isotonic  $K^+$  solutions (143 mM KCl, 5 mM glucose, 1 mM  $MgCl_2$ , 1 mM  $CaCl_2$ ) at different pH values (pH 4.5 solution buffered with 20 mM acetic acid, pH 5.5, 6.5, and 7.5 solutions buffered with 20 mM MES), containing 10  $\mu M$  nigericin and 5  $\mu M$  monensin. Cells were imaged 5 min after the addition of each solution to obtain the 490 nm/440 nm fluorescence ratio corresponding to each pH standard. A calibration curve was prepared from a least squares fit of mean background-subtracted fluorescence ratios as a function of pH.

## References

- Abbas, Y.M., Wu, D., Bueler, S.A., Robinson, C. V, Rubinstein, J.L., 2020. Structure of V-ATPase from the mammalian brain. *Science* 1, 1240–1246.
- Abrahams, J.P., Leslie, A.G., Lutter, R., Walker, J.E., 1994. Structure at 2.8 Å resolution of F1-ATPase from bovine heart mitochondria. *Nature* 370, 621–628. <https://doi.org/10.1038/370621a0>
- Adams, P.D., Afonine, P. V., Bunkóczi, G., Chen, V.B., Davis, I.W., Echols, N., Headd, J.J., Hung, L.W., Kapral, G.J., Grosse-Kunstleve, R.W., McCoy, A.J., Moriarty, N.W., Oeffner, R., Read, R.J., Richardson, D.C., Richardson, J.S., Terwilliger, T.C., Zwart, P.H., 2010. PHENIX: A comprehensive Python-based system for macromolecular structure solution. *Acta Cryst. D*66, 213–221. <https://doi.org/10.1107/S0907444909052925>
- Afonine, P. V., Poon, B.K., Read, R.J., Sobolev, O. V., Terwilliger, T.C., Urzhumtsev, A., Adams, P.D., 2018. Real-space refinement in PHENIX for cryo-EM and crystallography research papers. *Acta Cryst. D*74, 531–544. <https://doi.org/10.1107/S2059798318006551>
- Alam, H., Williams, T.W., Dumas, K.J., Guo, C., Yoshina, S., Mitani, S., Hu, P.J., 2010. EAK-7 controls development and life span by regulating nuclear DAF-16/FoxO activity. *Cell Metabolism* 12, 30–41. <https://doi.org/10.1016/j.cmet.2010.05.004>
- Bai, X.C., Rajendra, E., Yang, G., Shi, Y., Scheres, S.H.W., 2015. Sampling the conformational space of the catalytic subunit of human g-secretase. *eLife* 4, 1–19. <https://doi.org/10.7554/eLife.11182>
- Baldwin, P.R., Lyumkis, D., 2020. Non-uniformity of projection distributions attenuates resolution in. *Progress in Biophysics and Molecular Biology* 150, 160–183. <https://doi.org/10.1016/j.pbiomolbio.2019.09.002>
- Botelho, R.J., Teruel, M., Dierckman, R., Anderson, R., Wells, A., York, J.D., Meyer, T., Grinstein, S., 2000. Localized Biphasic Changes in Phosphatidylinositol-4, 5-Bisphosphate at Sites of Phagocytosis. *The Journal of Cell Biology* 151, 1353–1367.
- Burgoyne, R.D., Haynes, L.P., 2012. Understanding the physiological roles of the neuronal calcium sensor proteins. *Molecular Brain* 5. <https://doi.org/10.1186/1756-6606-5-2>
- Canton, J., Grinstein, S., 2015. Measuring lysosomal pH by fluorescence microscopy. *Methods in Cell Biology* 126, 85–99. <https://doi.org/10.1016/bs.mcb.2014.10.021>

- Cardone, G., Heymann, J.B., Steven, A.C., 2013. One number does not fit all: Mapping local variations in resolution in cryo-EM reconstructions. *Journal of Structural Biology* 184, 226–236. <https://doi.org/10.1016/j.jsb.2013.08.002>
- Castroflorio, E., den Hoed, J., Svistunova, D., Finelli, M.J., Cebrian-Serrano, A., Corrochano, S., Bassett, A.R., Davies, B., Oliver, P.L., 2021. The Ncoa7 locus regulates V-ATPase formation and function, neurodevelopment and behaviour. *Cell. Mol. Life Sci.* 78, 3503–3524. <https://doi.org/10.1007/s00018-020-03721-6>
- Chen, V.B., Arendall, W.B., Headd, J.J., Keedy, D.A., Immormino, R.M., Kapral, G.J., Murray, L.W., Richardson, J.S., Richardson, D.C., 2010. MolProbity: all-atom structure validation for macromolecular crystallography. *Acta Cryst D* 66, 12–21. <https://doi.org/10.1107/S0907444909042073>
- Cruciat, C.M., Ohkawara, B., Acebron, S.P., Karaulanov, E., Reinhard, C., Ingelfinger, D., Boutros, M., Niehrs, C., 2010. Requirement of prorenin receptor and vacuolar H<sup>+</sup>-ATPase-mediated acidification for Wnt signaling. *Science* 327, 459–463. <https://doi.org/10.1126/science.1179802>
- Doyle, T., Moncorgé, O., Bonaventure, B., Pollpeter, D., Lussignol, M., Tauziet, M., Apolonia, L., Catanese, M., Goujon, C., Malim, M.H., 2018. The interferon-inducible isoform of NCOA7 inhibits endosome-mediated viral entry. *Nature Microbiology* 3, 1369–1376. <https://doi.org/10.1038/s41564-018-0273-9>
- Eaton, A.F., Brown, D., Merkulova, M., 2021. The evolutionary conserved TLDC domain defines a new class of (H<sup>+</sup>)V-ATPase interacting proteins. *Sci Rep* 11, 22654. <https://doi.org/10.1038/s41598-021-01809-y>
- Eaton, A.F., Merkulova, M., Brown, D., 2020. The H<sup>+</sup> + ATPase (V-ATPase): from proton pump to signaling complex in health and disease.
- Emsley, P., Cowtan, K., 2004. Coot: Model-building tools for molecular graphics. *Acta Cryst D* 60, 2126–2132. <https://doi.org/10.1107/S0907444904019158>
- Finelli, M.J., Aprile, D., Castroflorio, E., Jeans, A., Moschetta, M., Chessum, L., Degiacomi, M.T., Grasegger, J., Lupien-Meilleur, A., Bassett, A., Rossignol, E., Campeau, P.M., Bowl, M.R., Benfenati, F., Fassio, A., Oliver, P.L., 2019. The epilepsy-associated protein TBC1D24 is required for normal development, survival and vesicle trafficking in mammalian neurons. *Human Molecular Genetics* 28, 584–597. <https://doi.org/10.1093/hmg/ddy370>
- Finelli, M.J., Oliver, P.L., 2017. TLDC proteins: new players in the oxidative stress response and neurological disease. *Mammalian Genome* 28, 395–406. <https://doi.org/10.1007/s00335-017-9706-7>
- Finelli, M.J., Sanchez-Pulido, L., Liu, K.X., Davies, K.E., Oliver, P.L., 2016. The evolutionarily conserved Tre2/Bub2/Cdc16 (TBC), lysin motif (LysM), domain catalytic (TLDC) domain is neuroprotective against oxidative stress. *Journal of Biological Chemistry* 291, 2751–2763. <https://doi.org/10.1074/jbc.M115.685222>
- Forgac, M., 2007. Vacuolar ATPases: rotary proton pumps in physiology and pathophysiology. *Nat Rev Mol Cell Biol* 8, 917–929. <https://doi.org/10.1038/nrm2272>
- Guo, H., Franken, E., Deng, Y., Benlekbir, S., Singla, G., Janssen, B., Yu, L., Ripstein, Z.A., Tan, Y.Z., John, L., 2020. Electron-event representation data enable efficient cryoEM file storage with full preservation of spatial and temporal resolution. *IUCrJ* 7, 860–869.
- Kane, P.M., 1995. Disassembly and reassembly of the yeast vacuolar H<sup>(+)</sup>-ATPase in vivo. *J Biol Chem* 270, 17025–17032.

- Kelley, L.A., Mezulis, S., Yates, C.M., Wass, M.N., Sternberg, M.J.E., 2015. The Phyre2 web portal for protein modeling, prediction and analysis. *Nature Protocols* 10:6 10, 845–858. <https://doi.org/10.1038/nprot.2015.053>
- Khan, M.M., Lee, S., Couoh-Cardel, S., Oot, R.A., Kim, H., Wilkens, S., Roh, S., 2021. Oxidative stress protein Oxr1 promotes V-ATPase holoenzyme disassembly in catalytic activity-independent manner. *The EMBO Journal* e109360, 1–17. <https://doi.org/10.15252/embj.2021109360>
- Knight, J.D.R., Choi, H., Gupta, G.D., Pelletier, L., Raught, B., Nesvizhskii, A.I., Gingras, A., 2017. ProHits-viz : a suite of web tools for visualizing interaction proteomics data PIQED : automated identification and quantification of protein modifications from DIA-MS data. *Nature Methods* 14, 645–646.
- Lee, B.S., Gluck, S.L., Holliday, L.S., 1999. Interaction between Vacuolar H<sup>+</sup>-ATPase and Microfilaments during Osteoclast Activation \* the resorption bay at the osteoclast attachment site on. *Journal of Biological Chemistry* 274, 29164–29171. <https://doi.org/10.1074/jbc.274.41.29164>
- Lee, R.Y., Hench, J., Ruvkun, G., 2001. Regulation of *C. elegans* DAF-16 and its human ortholog FKHRL1 by the daf-2 insulin-like signaling pathway. *Current Biology* 11, 1950–1957. [https://doi.org/10.1016/S0960-9822\(01\)00595-4](https://doi.org/10.1016/S0960-9822(01)00595-4)
- Lemmon, M.A., Fergusonti, K.M., O’Brien, R., Sigler, P.B., Schlessinger, J., 1995. Specific and high-affinity binding of inositol phosphates to an isolated pleckstrin homology domain. *Proc Natl Acad Sci U S A* 92, 10472–10476.
- Lin, K., Hsin, H., Libina, N., Kenyon, C., 2001. Regulation of the *Caenorhabditis elegans* longevity protein DAF-16 by insulin/IGF-1 and germline signaling. *Nature Genetics* 28, 139–145.
- Liu, G., Knight, J.D.R., Liu, G., Knight, J.D.R., Zhang, J.P., Tsou, C.-C., Wang, J., Lambert, J., Larsen, B., Tyers, M., Raught, B., Bandeira, N., Nesvizhskii, A.I., Choi, H., Gingras, A., 2016. Data Independent Acquisition analysis in ProHits 4 . 0. *Journal of Proteomics* 149, 64–68. <https://doi.org/10.1016/j.jprot.2016.04.042>
- Lu, M., Holliday, L.S., Zhang, L., Dunn, W.A., Gluck, S.L., 2001. Interaction between aldolase and vacuolar H<sup>+</sup>-ATPase. Evidence for direct coupling of glycolysis to the ATP-hydrolyzing proton pump. *Journal of Biological Chemistry* 276, 30407–30413. <https://doi.org/10.1074/jbc.M008768200>
- Ludtke, S.J., Baldwin, P.R., Chiu, W., 1999. EMAN: semiautomated software for high-resolution single-particle reconstructions. *J Struct Biol* 128, 82–97. [https://doi.org/10.1006/jsbi.1999.4174S1047-8477\(99\)94174-6](https://doi.org/10.1006/jsbi.1999.4174S1047-8477(99)94174-6) [pii]
- Marr, C.R., Benlekber, S., Rubinstein, J.L., 2014. Fabrication of carbon films with approximately 500 nm holes for cryo-EM with a direct detector device. *J Struct Biol* 185, 42–47. <https://doi.org/10.1016/j.jsb.2013.11.002>
- Maxson, M.E., Abbas, Y.M., Wu, J.Z., Grinstein, S., Rubinstein, J.L., 2021. Detection and quantification of the vacuolar H<sup>+</sup>-ATPase using the *Legionella* effector protein SidK. *bioRxiv* 10.1101/20.
- Mendonça, D.B., Nguyen, J.T., Haidar, F., Fox, A.L., Ray, C., Amatullah, H., Liu, F., Kim, J.K., Krebsbach, P.H., 2020. MicroRNA-1911-3p targets mEAK-7 to suppress mTOR signaling in human lung cancer cells. *Heliyon* 6, e05734. <https://doi.org/10.1016/J.HELIYON.2020.E05734>



- Merkulova, M., Paunescu, T.G., Azroyan, A., Marshansky, V., Breton, S., Brown, D., 2015. Mapping the H<sup>+</sup> (V)-ATPase interactome: Identification of proteins involved in trafficking, folding, assembly and phosphorylation. *Scientific Reports* 5, 1–15. <https://doi.org/10.1038/srep14827>
- Nguyen, J.T., Haidar, F.S., Fox, A.L., Ray, C., Mendonça, D.B., Kim, J.K., Krebsbach, P.H., 2019. mEAK-7 Forms an Alternative mTOR Complex with DNA-PKcs in Human Cancer. *iScience* 17, 190–207. <https://doi.org/10.1016/j.isci.2019.06.029>
- Nguyen, J.T., Ray, C., Fox, A.L., Mendonça, D.B., Kim, J.K., Krebsbach, P.H., 2018. Mammalian EAK-7 activates alternative mTOR signaling to regulate cell proliferation and migration. *Science Advances* 4, 1–16. <https://doi.org/10.1126/sciadv.aao5838>
- Park, J., Shrestha, R., Qiu, C., Kondo, A., Huang, S., Werth, M., Li, M., Barasch, J., Suszták, K., 2018. Single-cell transcriptomics of the mouse kidney reveals potential cellular targets of kidney disease. *Science* 360, 758–763. <https://doi.org/10.1126/science.aar2131>
- Parra, K.J., Keenan, K.L., Kane, P.M., 2000. The H subunit (VMA13p) of the yeast V-ATPase inhibits the ATPase activity of cytosolic V1 complexes. *Journal of Biological Chemistry* 275, 21761–21767. <https://doi.org/10.1074/jbc.M002305200>
- Punjani, A., Rubinstein, J.L., Fleet, D.J., Brubaker, M.A., 2017. cryoSPARC: Algorithms for rapid unsupervised cryo-EM structure determination. *Nature Methods* 14, 290–296. <https://doi.org/10.1038/nmeth.4169>
- Punjani, A., Zhang, H., Fleet, D.J., 2020. Non-uniform refinement: adaptive regularization improves single-particle cryo-EM reconstruction. *Nature Methods* 17, 1214–1221. <https://doi.org/10.1038/s41592-020-00990-8>
- Scheres, S.H.W., 2012. RELION: implementation of a Bayesian approach to cryo-EM structure determination. *J Struct Biol* 180, 519–530. <https://doi.org/10.1016/j.jsb.2012.09.006>
- Scheres, S.H.W., Gao, H., Valle, M., Herman, G.T., Eggermont, P.P.B., Frank, J., Carazo, J.-M., 2007. Disentangling conformational states of macromolecules in 3D-EM through likelihood optimization. *Nature methods* 4, 27–29. <https://doi.org/10.1038/nmeth992>
- Srivastava, A.P., Luo, M., Zhou, W., Symersky, J., Bai, D., Chambers, M.G., Faraldo-Gómez, J.D., Liao, M., Mueller, D.M., 2018. High-resolution cryo-EM analysis of the yeast ATP synthase in a lipid membrane. *Science (New York, N.Y.)* 9699, eaas9699. <https://doi.org/10.1126/science.aas9699>
- Sumner, J.P., Dow, J.A., Earley, F.G., Klein, U., Jager, D., Wiczorek, H., 1995. Regulation of plasma membrane V-ATPase activity by dissociation of peripheral subunits. *J Biol Chem* 270, 5649–5653.
- Svistunova, D.M., Simon, J.N., Rembeza, E., Crabtree, M., Yue, W.W., Oliver, P.L., Finelli, M.J., 2019. Oxidation resistance 1 regulates post-translational modifications of peroxiredoxin 2 in the cerebellum. *Free Radical Biology and Medicine* 130, 151–162. <https://doi.org/10.1016/j.freeradbiomed.2018.10.447>
- Tabke, K., Albertmelcher, A., Vitavska, O., Huss, M., Schmitz, H.-P., Wiczorek, H., 2014. Reversible disassembly of the yeast V-ATPase revisited under *in vivo* conditions. *Biochemical Journal* 462, 185–197. <https://doi.org/10.1042/BJ20131293>
- Tan, Y.Z., Abbas, Y.M., Wu, J.Z., Wu, D., Hesketh, G.G., Bueler, S.A., Gingras, A.-C., Robinson, C.V., Grinstein, S., Rubinstein, J.L., 2021. Structure of mammalian V-ATPase with the TLDC domain protein mEAK7 bound. *bioRxiv* 2021.11.03.466369. <https://doi.org/10.1101/2021.11.03.466369>

- Tan, Y.Z., Baldwin, P.R., Davis, J.H., Williamson, J.R., Potter, C.S., Carragher, B., Lyumkis, D., 2017. Addressing preferred specimen orientation in through tilting. *Nature Methods* 14, 793–796. <https://doi.org/10.1038/nmeth.4347>
- Toei, M., Saum, R., Forgacs, M., 2010. Regulation and isoform function of the V-ATPases. *Biochemistry* 49, 4715–4723. <https://doi.org/10.1021/bi100397s>
- Vaccari, T., Duchi, S., Cortese, K., Tacchetti, C., Bilder, D., 2010. The vacuolar ATPase is required for physiological as well as pathological activation of the Notch receptor. *Development* 137, 1825–1832. <https://doi.org/10.1242/dev.045484>
- Vasanthakumar, T., Keon, K.A., Bueler, S.A., Jaskolka, M.C., Rubinstein, J.L., 2021. Coordinated conformational changes in the V1 complex during V-ATPase reversible dissociation. *bioRxiv* 2021.11.09.467972. <https://doi.org/10.1101/2021.11.09.467972>
- Vasanthakumar, T., Rubinstein, J.L., 2020. Structure and Roles of V-type ATPases. *Trends in Biochemical Sciences* 45. <https://doi.org/10.1016/j.tibs.2019.12.007>
- Wang, L., Wu, D., Robinson, C. V., Wu, H., Fu, T., 2020. Structures of a Complete Human V-ATPase Reveal Mechanisms of Its Assembly. *Molecular Cell* 80, 1–11. <https://doi.org/10.1016/j.molcel.2020.09.029>
- Wang, R., Long, T., Hassan, A., Wang, J., Sun, Y., Xie, X.S., Li, X., 2020. Cryo-EM structures of intact V-ATPase from bovine brain. *Nature Communications* 11, 1–9. <https://doi.org/10.1038/s41467-020-17762-9>
- Wang, R.Y., Song, Y., Barad, B.A., Cheng, Y., Fraser, J.S., Dimaio, F., 2016. Automated structure refinement of macromolecular assemblies from cryo-EM maps using Rosetta. *eLife* 5, e17219. <https://doi.org/10.7554/eLife.17219>
- Wilhelm, M., Schlegl, J., Hahne, H., Gholami, A.M., Lieberenz, M., Savitski, M.M., Ziegler, E., Butzmann, L., Gessulat, S., Marx, H., Mathieson, T., Lemeer, S., Schnatbaum, K., Reimer, U., Wenschuh, H., Mollenhauer, M., Slotta-Huspenina, J., Boese, J.-H., Bantscheff, M., Gerstmair, A., Faerber, F., Kuster, B., 2014. Mass-spectrometry-based draft of the human proteome. *Nature* 2014 509:7502 509, 582–587. <https://doi.org/10.1038/nature13319>
- Yan, Y., Deneff, N., Schüpbach, T., 2009. The Vacuolar Proton Pump, V-ATPase, Is Required for Notch Signaling and Endosomal Trafficking in *Drosophila*. *Developmental Cell* 17, 387–402. <https://doi.org/10.1016/j.devcel.2009.07.001>
- Zhao, J., Benlekbir, S., Rubinstein, J.L., 2015. Electron cryomicroscopy observation of rotational states in a eukaryotic V-ATPase. *Nature* 521, 241–245. <https://doi.org/10.1038/nature14365>
- Zhao, J., Beyrakhova, K., Liu, Y., Alvarez, C.P., Bueler, S.A., Xu, L., Xu, C., Boniecki, M.T., Kanelis, V., Luo, Z.-Q., Cygler, M., Rubinstein, J.L., 2017. Molecular basis for the binding and modulation of V-ATPase by a bacterial effector protein. *PLoS Pathogens* 13, e1006394. <https://doi.org/10.1371/journal.ppat.1006394>
- Zheng, S.Q., Palovcak, E., Armache, J.-P., Verba, K.A., Cheng, Y., Agard, D.A., 2017. MotionCor2 : anisotropic correction of beam-induced motion for improved cryo-electron microscopy. *Nature methods* 14, 331–332. <https://doi.org/10.1038/nmeth.4193>
- Zivanov, J., Nakane, T., Scheres, S.H.W., 2019. A Bayesian approach to beam-induced motion correction in cryo-EM single-particle analysis. *IUCrJ* 6, 5–17. <https://doi.org/10.1107/S205225251801463X>
- Zoncu, R., Bar-Peled, L., Efeyan, A., Wang, S., Sancak, Y., Sabatini, D.M., 2011. mTORC1 senses lysosomal amino acids through an inside-out mechanism that requires the vacuolar

H-ATPase. *Science* 334, 678–683. <https://doi.org/10.1126/science.1207056>

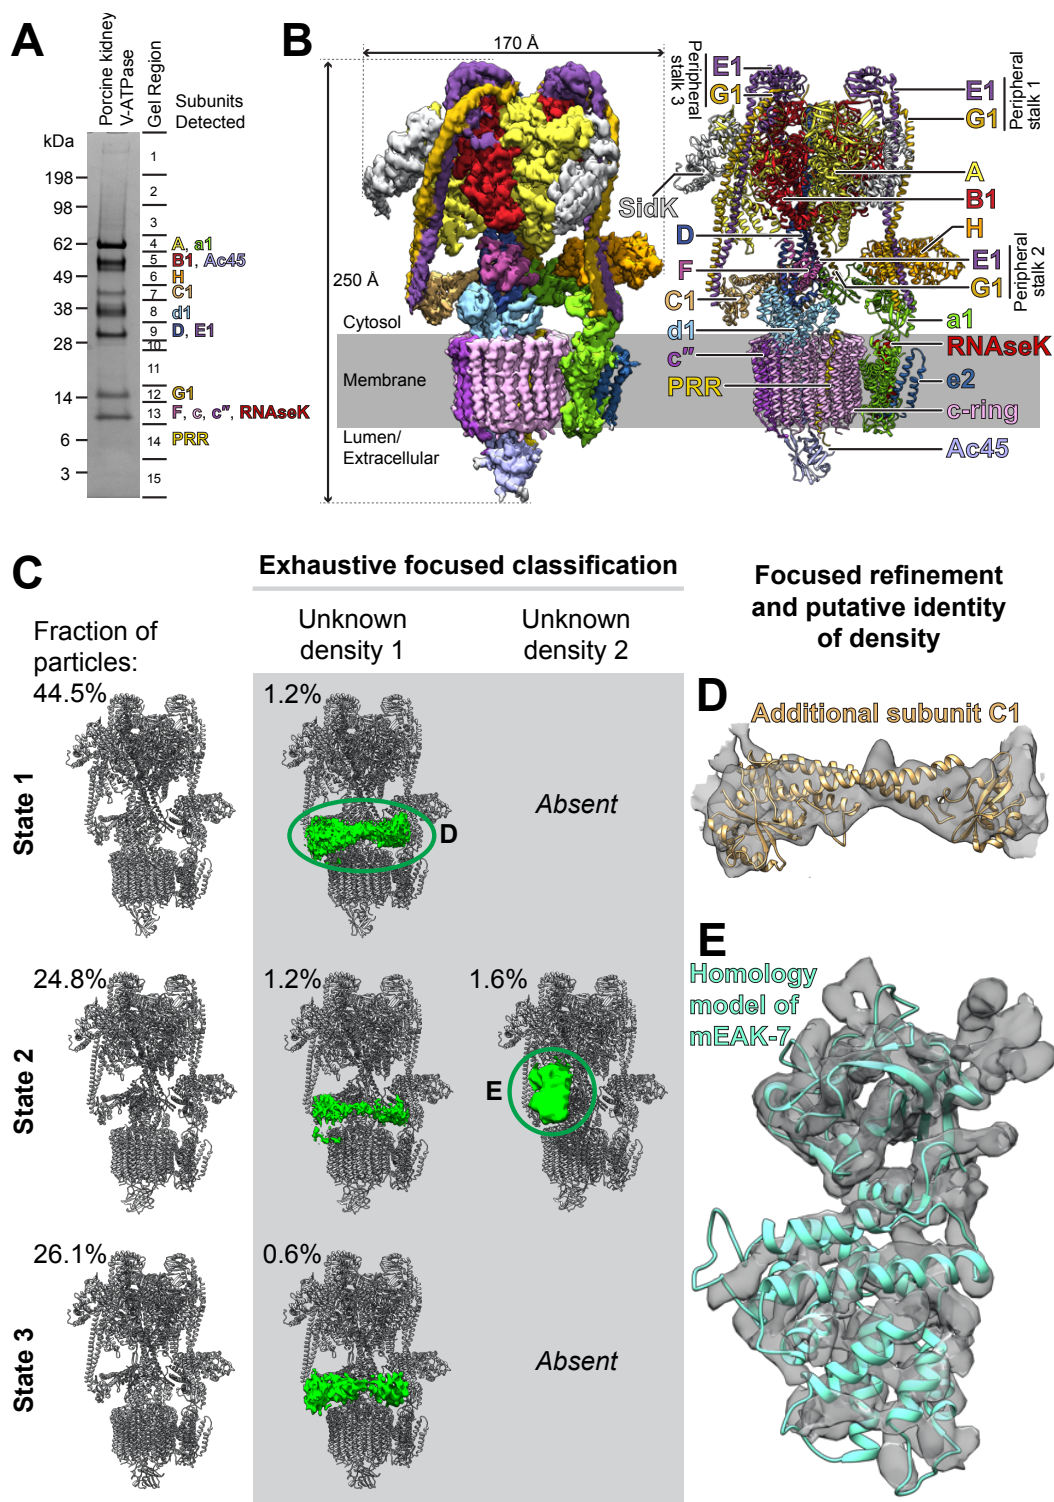

**Figure 1. Structure of porcine kidney V-ATPase.** **A**, SDS-PAGE gel showing subunit isoforms identified by mass spectrometry. **B**, CryoEM map (*left*) and atomic model (*right*) of V-ATPase from porcine kidney. **C**, Additional densities (*green*) bound to the V-ATPase. **D**, Fitting of an atomic model for subunit C into one of the additional densities. **E**, Fitting of a homology model for mEAK-7 into the other additional density.

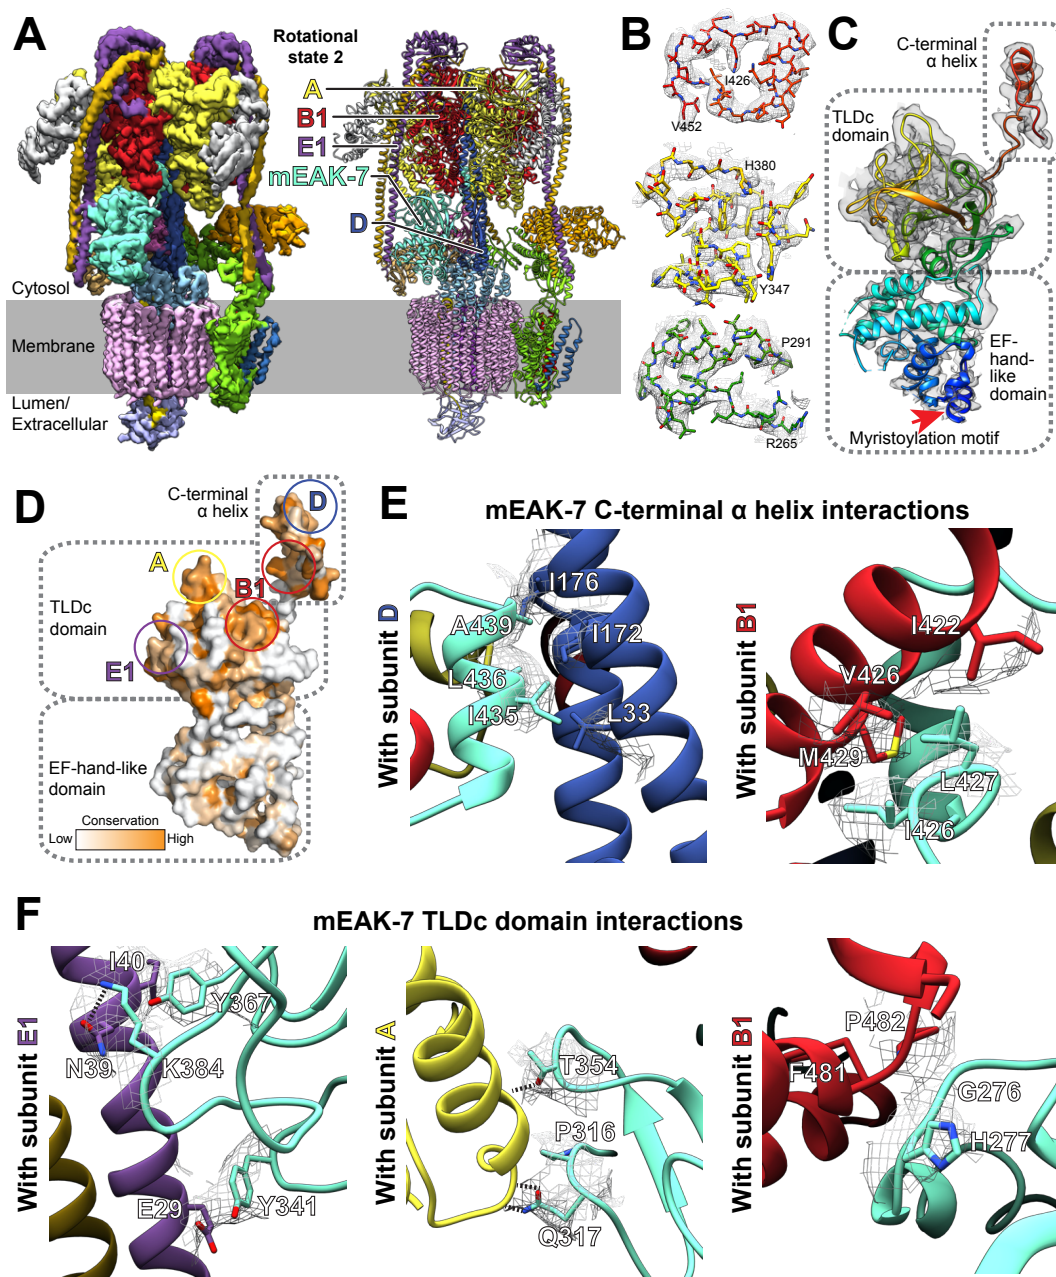

**Figure 2. Structure of mEAK-7 bound to V-ATPase crosslink's the enzyme's rotor and stator.** **A**, CryoEM map (left) and atomic model (right) for recombinant mEAK-7 bound to V-ATPase. **B**, Examples of model in map fit for mEAK-7. **C**, Domain structure of mEAK-7. The myristoylation motif in mEAK-7 is indicated (red arrow). **D**, Sequence conservation in mEAK-7. **E**, Interactions between the C-terminal  $\alpha$  helix of mEAK-7 and the rotor of V-ATPase. **F**, Interactions between the TLDC domain of mEAK-7 and subunits from the stator of V-ATPase.

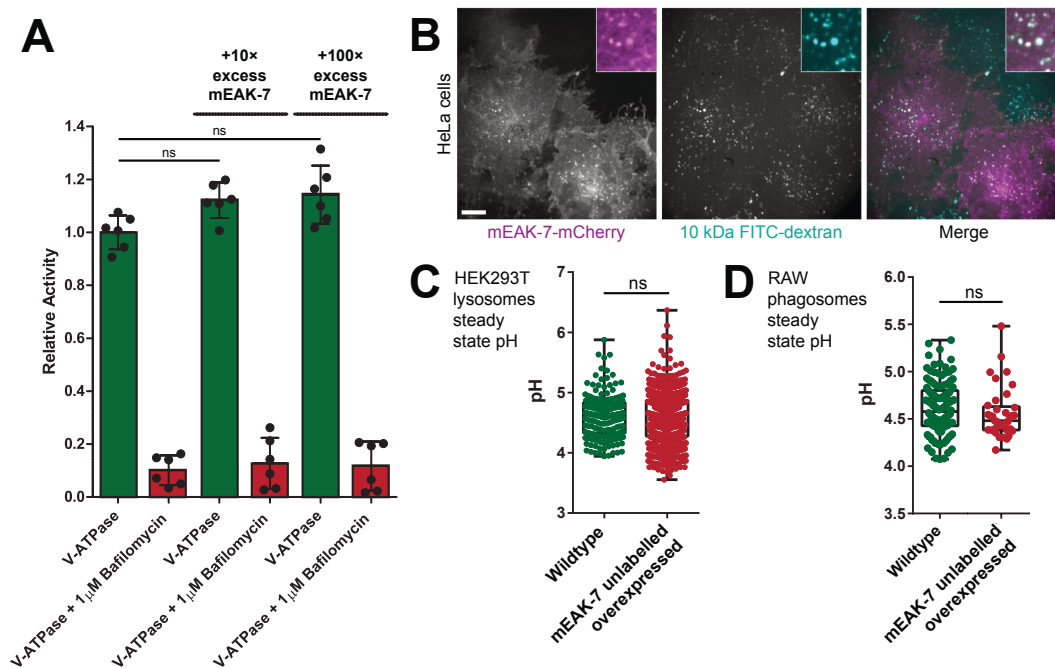

**Figure 3. mEAK-7 binding does not affect V-ATPase activity.** **A**, Recombinant mEAK-7 does not alter the ATPase activity or bafilomycin sensitivity of purified V-ATPase in vitro. **B**, mEAK-7-mCherry localizes to lysosomes in HEK293T cells, which were labelled with fluorescein isothiocyanate (FITC)-conjugated 10 kDa-dextran. Scale bar, 10  $\mu$ m. Overexpression of unlabeled mEAK-7 does not alter the steady state pH of lysosomes in HEK293T cells (**C**) or phagosomes in RAW 264.7 cells (**D**).

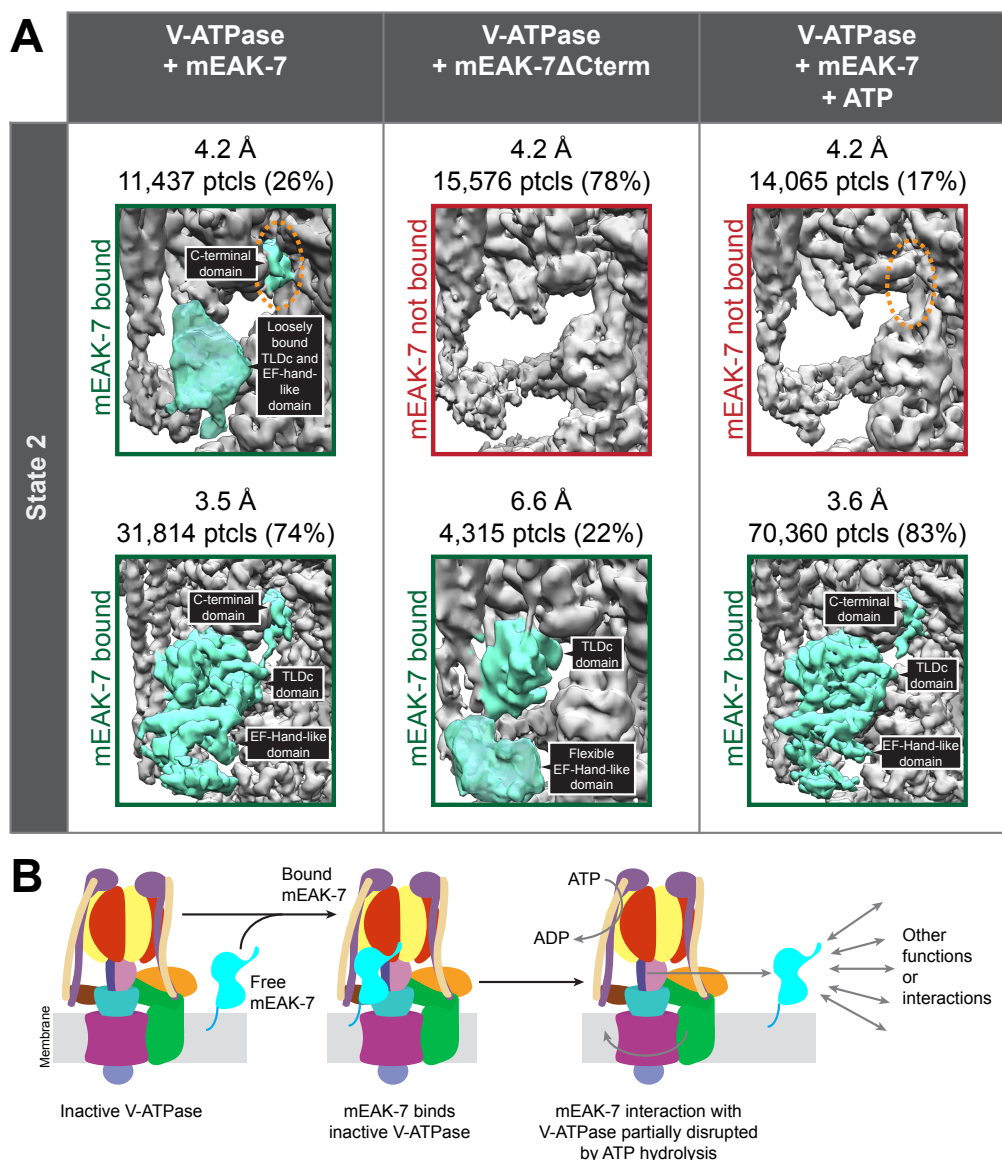

**Figure 4. C-terminal truncation and ATP hydrolysis suppress mEAK-7 binding to V-ATPase.** **A**, Intact mEAK-7 in the absence of ATP (*left*) binds V-ATPase in rotational State 2, with its C-terminal  $\alpha$  helix well-resolved in all 3D classes (*dashed orange ellipse*). Truncation of the C-terminal  $\alpha$  helix results in 3D classes lacking bound mEAK-7 (*center*). The addition of ATP to mEAK-7 and V-ATPase (*right*) results in a 3D class lacking density for the TLDC domain of mEAK-7 and its C-terminal  $\alpha$  helix (*dashed orange ellipse*). **B**, ATP-hydrolysis induced disruption of the association between mEAK-7 and V-ATPase could enable alternative functions in the cell.

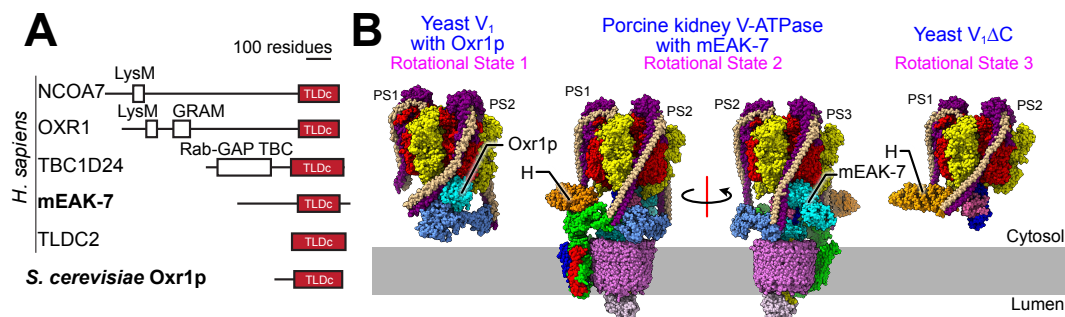

**Figure 5. TLDC domain interactions with V-ATPase.** **A**, TLDC domains are found in numerous different proteins. **B**, The TLDC domain from the yeast protein Oxr1p (*left*) interacts with yeast  $V_1$  complexes in rotational State 1, binds peripheral stalk 2 (PS2) and is mutually exclusive with subunit H binding. Oxr1p binding induces a sharp bend in PS2. mEAK-7 interacts with the intact V-ATPase in rotational State 2, binds peripheral stalk 3 (PS3), and does not affect subunit H binding (*middle two structures*). The structure is shown in two orientations to illustrate that mEAK-7 binding does not bend PS2 or PS3. A structure of yeast  $V_1\Delta C$  (*right*) in rotational State 3 shows the sharp bend in PS2 induced by subunit H, which is reminiscent of the bend in PS2 induced by Oxr1p but not mEAK7.
